# Supplementary material for: Rapid microarray processing using a disposable hybridization chamber with an integrated micropump
Source: Royal Society of Chemistry journal article supplement (doi:10.1039/c2lc21110f), 2012-01-01
Supplement: c2lc21110f.pdf [file c2lc21110f.pdf]

File Name : TPE\_based\_micropump\_on\_Microarray\_TOP\_VIEW.jpg

Caption : Figure 1: Top view of a thermoplastic elastomer micropump.

File Name : TPE\_based\_micropump\_on\_Microarray\_CROSS\_VIEW.jpg

Caption : Figure 2: Design of a thermoplastic elastomer micropump (cross) for rapid microarray processing.
