# Supplementary figures and images for: Rapid microarray processing using a disposable hybridization chamber with an integrated micropump
Source: Royal Society of Chemistry journal article supplement (doi:10.1039/c2lc21110f), 2012-01-01

**TPE based micropump on microarray chamber (top view)**

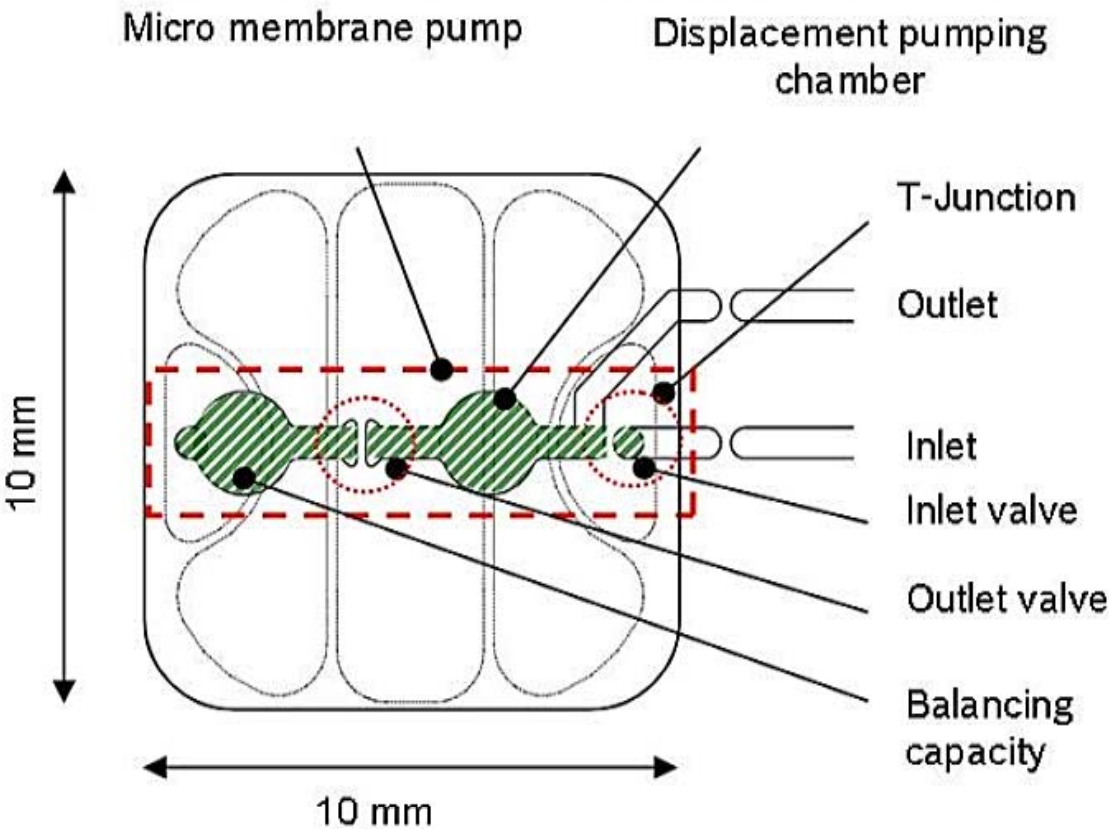

Supplement: c2lc21110f_2.pdf [file c2lc21110f_2.pdf]

### TPE based micropump on microarray chamber (cross)

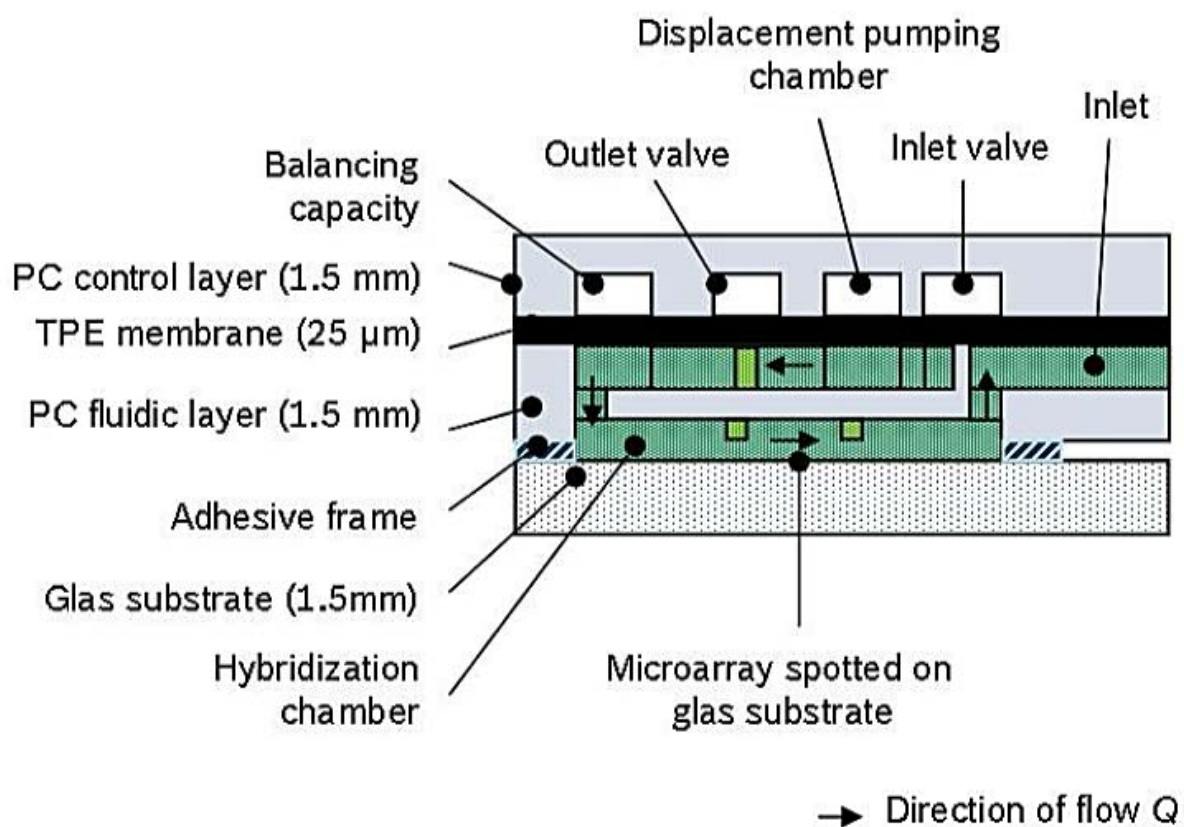

Supplement: c2lc21110f_3.pdf [file c2lc21110f_3.pdf]
